# Supplementary material
Source: HighWire-hosted journal article supplement (https://qualitysafety.bmj.com/content/27/7/512)
Supplement: inline-supplementary-material-1 [file inline-supplementary-material-1.docx]

**APPENDIX**

This list of qualifying narrow therapeutic index drugs was determined by the Cedars-Sinai Department of Pharmacy based on their clinical experience and an informal review of the literature.

- Carbamazepine
- Clindamycin
- Clonidine
- Cyclosporine
- Digoxin
- Lithium
- Phenytoin
- Prazosin
- Sirolimus
- Tacrolimus
- Valproic acid/valproate sodium syrup
