# Supplementary material
Source: HighWire-hosted journal article supplement (https://qualitysafety.bmj.com/content/27/7/512)
Supplement: inline-supplementary-material-2 [file inline-supplementary-material-2.docx]

**Supplementary Table.** Actual Examples of Admission Medication History (AMH) and Admission Medication Order (AMO) Error Severity Ratings.

| **Relevant Patient Background** | **Initial Clinical AMH Entry** | **Subsequent Reference Standard AMH Findings** | **AMH Error Severity Rating** | **Resultant AMO** | **Resultant AMO Error Severity** |
| --- | --- | --- | --- | --- | --- |
| 68 year old female admitted with chief complaint including diarrhea. | Patient noted to be taking docusate sodium 100 mg twice daily. | Patient was actually no longer taking docusate. | Significant (least severe): this error could have resulted in an inappropriate docusate order at admission or discharge. | No order placed for docusate. | Not applicable |
| 63 year old male admitted for chest pain and methadone withdrawal. | Patient noted to be taking methadone 20 mg every 12 hours. | Patient was actually taking methadone 20 mg every 8 hours. | Serious (intermediate severity) | Methadone 20 mg every 12 hours. | Serious: the lower methadone dose could have exacerbated withdrawal symptoms. |
| 58 year old female with factor V Leiden deficiency and lupus admitted for fever. | Patient noted to be taking megestrol 200 mg twice daily. | Patient was actually no longer taking megestrol. | Serious (intermediate severity) | Megestrol 200 mg twice daily. | Serious: megestrol could have caused a thrombotic event. |
| 58 year old female with factor V Leiden deficiency and lupus admitted for fever (same patient). | No anticoagulant noted in AMH. | Patient actually taking rivaroxaban 15 mg twice daily for hypercoagulable state. | Life-threatening (most severe) | No anticoagulant order placed. | Life-threatening: omission of rivaroxaban could have caused a thrombotic event. |
| 55 year old female with diabetes mellitus admitted for abdominal pain. | Patient noted to be using fentanyl 100 mcg patch every 72 hours. | Patient actually no longer using fentanyl patches. | Life-threatening (most severe): fentanyl order could have caused severe respiratory depression. | Resultant order placed: fentanyl 100 mcg patch every 72 hours. | Serious: order error severity downgraded by physician reviewers because patient was in pain. |
